# Supplementary material
Source: publisher figshare collection journal article supplement (https://frontiersin.figshare.com/ndownloader/files/15427325)
Supplement: Supplementary file [file 15427325]

**Table S1. *ACL5* orthologs in the selected species**

| Clade       | Species                          | Gene            | Code                        |
|-------------|----------------------------------|-----------------|-----------------------------|
| Angiosperms | <i>Arabidopsis thaliana</i>      | <i>AtACL5</i>   | AT5G19530.1                 |
| Gymnosperms | <i>Picea abies</i>               | <i>PaACL5.1</i> | PAB00026429                 |
|             |                                  | <i>PaACL5.2</i> | PAB00036924                 |
| Lycophytes  | <i>Selaginella lepidophylla</i>  | <i>SlACL5.1</i> | onekp:ABIJ_scaffold_2009837 |
|             |                                  | <i>SlACL5.2</i> | onekp:ABIJ_scaffold_2009492 |
| Bryophytes  | <i>Physcomitrella patens</i>     | <i>PpACL5.1</i> | Pp3c5_6270V3                |
|             |                                  | <i>PpACL5.2</i> | Pp3c6_27380V3               |
|             |                                  | <i>PpACL5.3</i> | Pp3c27_3260V3               |
| Liverworts  | <i>Marchantia polymorpha</i>     | <i>MpACL5</i>   | Mapoly0012s0100             |
| Green algae | <i>Chlamydomonas reinhardtii</i> | <i>CrACL5</i>   | Cre06.g251500               |

**Table S2. Oligos used for PCR amplification**

| Gene                   | Forward                  | Reverse                     | cDNA product (bp) | gDNA product (bp) |
|------------------------|--------------------------|-----------------------------|-------------------|-------------------|
| <b><i>AtACL5</i></b>   | AACATTCTCAAACCCAAGCTTAGC | ATGGTGTTGTAGATTGATGTGAAGACT | 107               | 213               |
| <b><i>PaACL5.1</i></b> | CCGCCTTGAGCTCGTTATCAAC   | CTGGGTCTGCAAGGTCTCCTAC      | 92                | 160               |
| <b><i>PpACL5.1</i></b> | CAGTGGCAGGAGGTCCTTGTTA   | GGAGTAGACCTCTGTGTGCGTT      | 140               | 277               |
| <b><i>MpACL5</i></b>   | GTGAGAAAATCGTTGGCCCAGG   | TTCGCATTGGTTCCATGTCC        | 83                | –                 |
| <b><i>CrACL5</i></b>   | TCACGCTCATCAACGACGAC     | ACCACGTTGCGGTAAAACTC        | 145               | 291               |
